# Supplementary material for: Effects of enhanced hydrological connectivity on Mediterranean salt marsh fish assemblages with emphasis on the endangered Spanish toothcarp (Aphanius iberus)
Source: PeerJ. 2017 Feb 28;5:e3009. doi: 10.7717/peerj.3009 (PMC5333551; doi:10.7717/peerj.3009)
Supplement: Supplemental Information 1 — Abundances of fish species at each study year and zone. Each row indicates numbers of individuals within a given fykenet. [file peerj-05-3009-s001.xlsx]

## Sheet: Zones A & B
Date	Zone	Pool	Fykenet code No.	Prof. (cm)	Slope	Sub veg (%)	Rip Veg (%)	Nat. subs	Art. Subs	AIB	PMI	ABO	SA	AAN	SP	Mug.	SAB	DLA	SYA	Gb sp	LRA	CAR
Ap-2011	Zone A	B1	1	43	50	100	50	1	0	121	30	27	0	1	0	3	0	0	0	0	0	5
Ap-2011	Zone A	B1	2	43	50	50	50	1	0	56	117	1	0	0	0	1	0	0	0	0	0	4
Ap-2011	Zone A	B1	3	53	50	25	75	1	0	92	99	10	2	1	0	1	0	0	0	0	0	0
Ap-2011	Zone A	B5	1	28	50	75	25	0	1	195	0	1	0	1	0	2	0	0	0	0	0	0
Ap-2011	Zone A	B5	2	18	25	50	25	0	1	117	0	0	0	0	0	0	0	0	0	0	0	0
Ap-2011	Zone A	B7	1	37	25	75	25	0	1	30	0	3	0	0	0	0	0	0	0	0	0	0
Ap-2011	Zone A	B7	2	26	25	50	25	0	1	16	0	0	0	0	0	0	0	0	0	0	0	0
Ap-2011	Zone A	B8	1	53	50	5	25	1	0	3508	0	0	0	0	0	0	0	0	0	0	0	0
Ap-2011	Zone A	B8	2	32	25	5	25	1	0	445	0	0	0	0	0	1	0	0	0	0	0	0
Ap-2011	Zone A	B8	3	57	50	5	100	1	0	4250	0	0	0	0	0	0	0	0	0	0	0	0
Ap-2011	Zone A	B9	1	39	50	5	100	1	0	247	26	0	0	2	0	0	0	0	0	0	0	0
Ap-2011	Zone A	B9	2	39	50	5	100	1	0	270	45	0	0	3	0	0	0	0	0	0	0	0
Ap-2011	Zone A	B9	3	39	50	5	100	1	0	245	54	0	0	1	0	1	0	0	0	0	0	0
Ap-2011	Zone A	B10	1	52	50	5	50	1	0	926	196	1	0	0	0	0	0	0	0	0	0	1
Ap-2011	Zone A	B10	2	45	50	5	100	1	0	582	158	1	0	1	0	0	0	0	0	0	0	0
Ap-2011	Zone A	B10	3	52	50	5	5	1	0	1045	233	0	0	0	0	0	0	0	0	0	0	0
Ap-2011	Zone A	B11	1	37	25	100	100	1	0	10	0	0	0	8	0	1	0	0	0	0	0	1
Ap-2011	Zone A	B11	2	39	25	100	100	1	0	2	0	0	0	0	0	0	0	0	0	0	0	0
Ap-2011	Zone A	B11	3	41	25	100	100	1	0	3	0	0	0	4	0	0	0	0	0	0	0	2
Ap-2011	Zone A	B12	1	40	25	100	100	1	0	75	0	0	0	1	0	0	0	0	0	0	0	0
Ap-2011	Zone A	B12	2	46	25	100	100	1	0	18	0	0	0	1	0	0	0	0	0	0	0	0
Ap-2011	Zone A	B12	3	49	25	100	100	1	0	29	0	0	0	0	0	1	0	0	0	0	0	2
Ap-2011	Zone A	B13	1	42	50	5	75	1	0	122	3	0	0	0	0	0	0	0	0	0	0	0
Ap-2011	Zone A	B13	2	31	25	25	75	1	0	179	51	0	0	1	0	1	0	0	0	0	0	1
Ap-2011	Zone A	B13	3	32	25	75	100	1	0	1623	70	0	0	0	0	0	0	0	0	0	0	0
Ap-2011	Zone A	B14	1	32	25	5	75	1	0	194	55	0	0	0	0	1	0	0	0	0	0	0
Ap-2011	Zone A	B14	2	36	25	5	75	1	0	1030	112	0	0	1	0	0	0	0	0	0	0	0
Ap-2011	Zone A	B14	3	41	25	5	75	1	0	691	112	0	0	0	0	0	0	0	0	0	0	0
Ap-2011	Zone A	C1	1	34	25	100	100	1	0	214	2	13	0	2	0	1	0	0	0	0	0	4
Ap-2011	Zone A	C1	2	33	25	100	100	1	0	294	3	24	0	0	0	2	0	0	0	0	0	2
Ap-2011	Zone A	C1	3	34	25	75	100	1	0	30	0	24	0	1	0	0	0	0	0	0	0	4
Ap-2011	Zone A	C2	1	44.5	25	100	100	1	0	217	1	35	0	0	3	0	0	0	0	0	0	2
Ap-2011	Zone A	C2	2	50	25	75	50	1	0	70	0	9	0	1	2	1	0	0	0	0	0	0
Ap-2011	Zone A	C2	3	47.5	25	100	50	1	0	81	0	11	0	0	2	1	0	0	0	0	0	0
Ap-2011	Zone A	C3	1	35.8	25	100	75	1	0	279	4	8	0	0	0	0	0	0	0	0	0	0
Ap-2011	Zone A	C3	2	39.7	25	75	75	1	0	153	5	5	0	1	0	1	0	0	0	0	0	2
Ap-2011	Zone A	C3	3	43.7	25	75	50	1	0	178	14	1	0	0	0	0	0	0	0	0	0	0
Ap-2011	Zone A	C4	1	34	25	100	100	1	0	379	0	0	0	0	0	1	0	0	0	0	0	0
Ap-2011	Zone A	C4	2	35	25	75	100	1	0	261	31	0	0	1	0	1	0	0	0	0	0	0
Ap-2011	Zone A	C4	3	36	25	100	100	1	0	212	3	9	0	1	0	0	0	0	0	0	0	0
Ap-2011	Zone A	C5	1	40	25	100	25	1	0	595	11	0	0	1	0	1	0	0	0	0	0	0
Ap-2011	Zone A	C5	2	41	25	5	100	1	0	407	38	0	0	0	0	0	0	0	0	0	0	1
Ap-2011	Zone A	C5	3	46	25	5	5	1	0	640	45	0	0	1	0	0	0	0	0	0	0	0
Ap-2011	Zone A	C6	1	55	25	100	100	1	0	239	3	0	0	0	0	0	0	0	0	0	0	0
Ap-2011	Zone A	C6	2	62	25	100	75	1	0	255	3	0	0	1	0	1	0	0	0	0	0	0
Ap-2011	Zone A	C6	3	47	25	75	100	1	0	185	6	0	0	0	0	0	0	0	0	0	0	0
Ap-2011	Zone A	C7	1	52	50	50	100	1	0	489	90	0	0	1	0	1	0	0	0	0	0	0
Ap-2011	Zone A	C7	2	38	25	25	100	1	0	296	93	0	0	0	0	0	0	0	0	0	0	0
Ap-2011	Zone A	C7	3	45	25	25	100	1	0	342	22	0	0	1	0	0	0	0	0	0	0	0
Ap-2011	Zone A	C8	1	44	25	75	100	1	0	245	131	0	0	0	0	1	0	0	0	0	0	0
Ap-2011	Zone A	C8	2	38	25	75	100	1	0	660	30	0	0	1	0	1	0	0	0	0	0	0
Ap-2011	Zone A	C8	3	38	25	100	100	1	0	315	46	0	0	0	0	0	0	0	0	0	0	1
Ap-2011	Zone A	D1	1	39.5	25	25	100	1	0	2	15	0	0	1	0	1	0	0	0	0	0	6
Ap-2011	Zone A	D1	2	45	50	25	100	1	0	3	35	0	9	0	0	0	0	0	0	0	0	10
Ap-2011	Zone A	D1	3	43	50	5	100	1	0	6	9	1	2	1	0	1	0	0	0	0	0	5
Ap-2011	Zone A	D2	1	38	25	5	75	1	0	1430	1	0	0	0	0	0	0	0	0	0	0	0
Ap-2011	Zone A	D2	2	39	50	5	100	1	0	970	1	0	0	0	0	1	0	0	0	0	0	0
Ap-2011	Zone A	D2	3	38	50	5	100	1	0	850	0	0	1	1	0	0	0	0	0	0	0	0
Ap-2011	Zone A	D3	1	38	25	5	100	1	0	2	1	0	0	1	0	0	0	0	0	0	0	7
Ap-2011	Zone A	D3	2	43	50	5	100	1	0	0	1	0	1	0	0	1	0	0	0	0	0	8
Ap-2011	Zone A	D3	3	41	50	5	100	1	0	0	0	0	0	1	0	0	0	0	0	0	0	12
Ap-2011	Zone A	D4	1	38	25	5	100	1	0	644	0	0	0	1	0	0	0	0	0	0	0	0
Ap-2011	Zone A	D4	2	36	25	5	100	1	0	614	0	0	0	1	0	1	0	0	0	0	0	0
Ap-2011	Zone A	D4	3	36	25	5	100	1	0	633	1	0	0	1	0	0	0	0	0	0	0	0
Ap-2011	Zone A	D5	1	38	25	5	5	1	0	90	1	0	0	1	0	0	0	0	0	0	0	0
Ap-2011	Zone A	D5	2	38	25	5	100	1	0	268	0	0	0	0	0	1	0	0	0	0	0	0
Ap-2011	Zone A	D5	3	30	25	5	100	1	0	82	1	0	0	1	0	0	0	0	0	0	0	0
Ap-2011	Zone A	D6	1	39.5	25	5	100	1	0	248	0	0	0	1	0	1	0	0	0	0	0	0
Ap-2011	Zone A	D6	2	41.4	25	5	75	1	0	552	0	0	0	1	0	0	0	0	0	0	0	0
Ap-2011	Zone A	D6	3	43.9	25	5	100	1	0	356	0	0	0	1	0	1	0	0	0	0	0	0
Ap-2011	Zone A	D7	1	46.5	25	25	100	1	0	623	1	0	0	0	0	1	0	0	0	0	0	0
Ap-2011	Zone A	D7	2	50	50	25	100	1	0	1027	0	0	0	1	0	0	0	0	0	0	0	0
Ap-2011	Zone A	D7	3	43	25	5	100	1	0	40	0	0	0	1	0	1	0	0	0	0	0	0
Ap-2011	Zone A	D8	1	42	50	75	100	1	0	2	10	0	0	0	0	0	0	0	0	0	0	0
Ap-2011	Zone A	D8	2	48	50	100	100	1	0	2	0	0	0	1	0	0	0	1	0	0	0	0
Ap-2011	Zone A	D8	3	38	25	100	100	1	0	0	0	0	0	0	0	0	0	0	0	0	0	0
Ap-2011	Zone B	E2	1	36	25	75	100	1	0	4	0	0	1	0	0	1	0	0	0	0	0	0
Ap-2011	Zone B	E2	3	45.5	50	50	100	1	0	95	10	3	0	0	0	0	0	0	0	0	0	4
Ap-2011	Zone B	E5	3	37	25	75	100	1	0	0	1	0	0	0	0	0	0	0	0	0	0	0
Ap-2011	Zone B	E6	1	53	50	50	100	1	0	3	1	2	1	0	0	0	0	0	0	0	0	4
Ap-2011	Zone B	E6	2	45	25	100	100	1	0	2	0	3	0	0	0	0	0	0	0	0	0	4
Ap-2011	Zone B	E6	3	41	25	100	100	1	0	0	1	4	0	0	0	0	0	0	0	0	0	5
Ap-2011	Zone B	E7	1	44	25	100	75	1	0	0	1	1	0	0	0	0	0	0	0	0	0	0
Ap-2011	Zone B	E7	2	41	25	25	100	1	0	0	1	1	0	0	0	0	0	0	0	0	0	7
Ap-2011	Zone B	E7	3	38	25	100	25	1	0	0	1	1	0	0	0	0	0	0	0	0	0	0
Ap-2011	Zone B	E8	1	45	25	100	100	1	0	242	1	14	0	0	0	2	0	0	0	0	0	2
Ap-2011	Zone B	E8	2	57.7	25	100	100	1	0	310	1	2	0	0	0	0	0	0	0	0	0	2
Ap-2011	Zone B	E8	3	43.3	25	75	100	1	0	171	1	11	0	0	0	0	0	0	1	0	0	0
Ap-2011	Zone B	E9	1	47	25	50	75	1	0	1	13	0	9	0	0	0	0	0	0	0	0	0
Ap-2011	Zone B	E9	2	42	25	75	75	0	1	0	1	0	4	0	1	0	0	0	0	0	0	0
Ap-2011	Zone B	E9	3	55	25	50	75	0	1	0	4	0	4	0	0	0	0	0	0	0	0	0
Ap-2011	Zone B	E10	1	41	50	100	100	0	1	0	4	0	1	0	0	0	0	0	0	0	0	2
Ap-2011	Zone B	E10	2	59.4	50	75	100	0	1	0	9	0	1	0	0	0	0	0	0	0	0	3
Ap-2011	Zone B	E10	3	43.3	50	75	75	1	0	0	1	0	0	0	0	0	0	0	0	0	0	4
Ap-2011	Zone B	E11	1	44.8	50	100	100	0	1	1	1	1	1	0	0	0	0	0	0	0	0	1
Ap-2011	Zone B	E11	2	50.8	50	100	100	1	0	0	1	0	0	0	0	0	0	0	0	0	0	4
Ap-2011	Zone B	E11	3	46	50	75	100	0	1	0	6	0	7	0	0	0	0	0	0	0	0	0
Ap-2011	Zone B	E12	1	45	25	5	100	1	0	272	6	1	6	0	0	3	0	0	0	0	0	1
Ap-2011	Zone B	E12	2	40	25	5	75	1	0	248	7	1	7	0	0	2	0	0	0	0	0	6
Ap-2011	Zone B	E12	3	52	25	5	75	1	0	350	1	1	10	0	0	8	0	0	0	0	0	6
Ap-2011	Zone B	F1	1	55	25	50	100	1	0	130	3	6	0	0	0	0	0	0	0	0	0	1
Ap-2011	Zone B	F1	2	44	25	100	100	1	0	56	2	0	0	0	0	0	0	0	0	0	0	3
Ap-2011	Zone B	F1	3	39	25	100	100	1	0	44	1	2	1	1	0	2	0	0	0	0	0	4
Ap-2011	Zone B	F2	1	36	25	50	100	1	0	25	4	3	0	0	0	0	0	0	0	0	0	0
Ap-2011	Zone B	F2	2	40	25	100	75	1	0	22	2	0	0	1	0	0	0	0	0	0	0	0
Ap-2011	Zone B	F2	3	36	25	75	100	1	0	376	3	2	0	1	0	0	0	0	0	0	0	0
Ap-2011	Zone B	F3	1	37	25	25	100	1	0	51	1	2	0	1	0	2	0	0	0	0	0	2
Ap-2011	Zone B	F3	2	39	25	50	100	1	0	41	2	1	0	0	0	1	0	0	0	0	0	3
Ap-2011	Zone B	F3	3	49	25	75	100	1	0	5	1	0	0	0	0	0	0	0	0	0	0	2
Ap-2011	Zone B	F4	1	51	25	5	100	1	0	2	6	2	3	0	0	0	0	0	0	0	0	2
Ap-2011	Zone B	F4	2	52.4	25	5	100	1	0	1	1	0	2	1	0	0	0	0	0	0	0	0
Ap-2011	Zone B	F4	3	42	25	100	100	1	0	2	1	2	0	11	0	0	0	0	0	0	0	15
Ap-2011	Zone B	F5	1	38.5	25	5	100	1	0	22	1	0	0	1	0	0	0	0	0	0	0	7
Ap-2011	Zone B	F5	2	41.5	50	25	100	1	0	6	3	0	0	1	0	0	0	0	0	0	0	5
Ap-2011	Zone B	F5	3	43.5	25	15	100	1	0	1	1	1	0	1	0	0	0	0	0	0	0	5
Ap-2011	Zone B	F6	1	37.8	50	5	100	1	0	1	1	1	0	0	0	0	0	0	0	0	0	0
Ap-2011	Zone B	F6	2	42.5	25	5	100	1	0	1	1	1	0	0	0	0	0	0	0	0	0	0
Ap-2011	Zone B	F6	3	56.5	50	5	100	1	0	1	1	1	0	1	0	0	0	0	0	0	0	0
Ap-2011	Zone B	F7	1	39	25	5	100	1	0	184	1	0	0	1	0	0	0	0	0	0	0	0
Ap-2011	Zone B	F7	2	38	25	5	75	1	0	66	6	0	0	1	0	0	0	0	0	0	0	0
Ap-2011	Zone B	F7	3	37	25	5	100	1	0	52	6	0	0	1	0	0	0	0	0	0	0	0
Ap-2011	Zone B	F8	1	51	50	25	100	1	0	1	1	1	0	0	0	0	0	0	0	0	0	6
Ap-2011	Zone B	F8	2	45	50	25	100	1	0	1	1	1	1	1	0	0	0	0	0	0	0	4
Ap-2011	Zone B	F8	3	40	25	25	100	1	0	1	1	1	1	1	0	0	0	0	0	0	0	5
Ap-2011	Zone B	F9	1	53.55	25	5	100	1	0	1	1	1	0	1	0	0	0	0	0	0	0	0
Ap-2011	Zone B	F9	2	43	25	5	100	1	0	1	1	1	0	0	0	0	0	0	0	0	0	1
Ap-2011	Zone B	F9	3	52.4	50	5	100	1	0	1	1	1	0	1	0	0	0	0	0	0	0	0
Ap-2011	Zone B	F10	1	39	50	100	25	1	0	2	1	1	0	1	0	0	0	0	0	0	0	6
Ap-2011	Zone B	F10	2	50	50	100	100	1	0	1	1	1	0	1	0	0	0	0	0	0	0	13
Ap-2011	Zone B	F10	3	40	25	100	100	1	0	1	2	0	1	1	0	0	0	0	0	0	0	1
Ap-2011	Zone B	F11	1	40	50	100	75	1	0	1	1	0	1	1	0	0	0	0	0	0	0	9
Ap-2011	Zone B	F11	2	38	25	100	100	1	0	1	1	1	0	1	0	0	0	0	0	0	0	1
Ap-2011	Zone B	F11	3	40	25	100	75	1	0	1	1	0	1	0	0	0	0	0	0	0	0	9
Ap-2011	Zone B	F12	1	76.2	50	75	100	0	1	1	5	0	4	1	0	0	0	0	0	0	0	5
Ap-2011	Zone B	F12	2	45.5	25	100	100	1	0	1	1	0	0	1	0	0	0	0	0	0	0	9
Ap-2011	Zone B	F12	3	48.6	50	100	100	0	1	1	1	0	0	1	0	0	0	0	0	0	0	3
Ap-2011	Zone B	F13	1	49	25	100	100	1	0	2	1	2	2	1	0	1	0	0	0	0	0	3
Ap-2011	Zone B	F13	2	47	25	75	25	1	0	1	5	0	5	0	0	0	0	0	0	0	0	10
Ap-2011	Zone B	F13	3	39.2	25	25	100	1	0	1	8	1	7	0	0	0	0	0	0	0	0	3
Ap-2012	Zone A		1	58	50	75	5	1	0	6	11	1	0	0	0	0	0	0	0	0	0	1
Ap-2012	Zone A		2	46	50	100	50	1	0	20	6	1	0	0	0	0	0	0	0	0	0	0
Ap-2012	Zone A		3	45	25	5	25	1	0	2	2	1	0	0	0	0	0	0	0	0	0	0
Ap-2012	Zone A		4	36	25	25	50	1	0	2	8	1	0	0	0	0	0	0	0	0	0	0
Ap-2012	Zone A		5	64	25	5	100	1	0	42	11	1	0	0	0	0	0	0	0	0	0	0
Ap-2012	Zone A		6	50	25	5	25	1	0	8	0	1	0	0	0	0	1	0	0	0	0	1
Ap-2012	Zone A		7	38	25	5	5	1	0	7	0	0	0	0	0	0	0	0	0	0	0	0
Ap-2012	Zone A		8	52	50	5	100	1	0	262	2	1	0	2	0	0	0	0	0	0	0	0
Ap-2012	Zone A		12	47	25	25	5	1	0	68	6	2	0	0	0	0	1	0	0	0	0	0
Ap-2012	Zone A		14	38	25	50	100	1	0	6	15	0	0	0	0	0	0	0	0	0	0	1
Ap-2012	Zone A		15	54	25	75	100	1	0	7	0	1	0	0	0	0	0	0	0	0	0	0
Ap-2012	Zone A		16	47	25	50	100	1	0	3	0	1	0	0	0	0	0	0	0	0	0	0
Ap-2012	Zone A		17	48	25	50	100	1	0	10	0	1	0	0	0	0	1	0	0	0	0	0
Ap-2012	Zone A		18	40	25	5	50	1	0	2	0	0	0	0	0	0	0	0	0	0	0	0
Ap-2012	Zone A		32	43	25	100	100	1	0	13	7	1	0	1	0	0	0	0	0	0	0	0
Ap-2012	Zone A		33	67	25	5	75	1	0	8	0	3	0	0	0	1	0	0	0	0	0	0
Ap-2012	Zone A		34	90	50	5	75	1	0	18	12	3	0	1	0	0	0	0	0	0	0	1
Ap-2012	Zone A		35	61	50	5	100	1	0	7	1	1	0	1	0	1	0	0	0	0	0	0
Ap-2012	Zone A		36	71	50	5	25	1	0	25	0	1	0	1	0	10	0	0	0	0	0	0
Ap-2012	Zone A		37	50	25	100	25	1	0	16	2	1	0	0	0	0	0	0	0	0	0	0
Ap-2012	Zone A		38	44	25	5	50	1	0	64	0	1	0	0	0	0	0	0	0	0	0	0
Ap-2012	Zone A		39	59	25	5	25	1	0	152	0	1	0	1	0	1	0	0	0	0	0	0
Ap-2012	Zone A		40	50	25	100	100	1	0	57	8	1	0	1	0	1	0	0	1	0	0	0
Ap-2012	Zone A		41	56	25	25	5	1	0	233	0	19	0	1	0	0	1	0	0	0	0	0
Ap-2012	Zone A		42	58	25	5	5	1	0	780	1	1	0	1	0	1	1	0	0	0	0	5
Ap-2012	Zone A		43	54	25	25	25	1	0	71	1	3	0	1	0	0	0	0	1	0	0	0
Ap-2012	Zone A		44	61	50	25	5	1	0	8	2	25	0	1	0	1	1	0	0	0	0	0
Ap-2012	Zone A		45	52	25	5	50	1	0	790	1	3	0	2	0	1	0	0	0	0	0	2
Ap-2012	Zone A		46	63	50	100	5	1	0	308	1	42	0	2	0	1	0	0	1	0	0	1
Ap-2012	Zone A		47	51	25	5	50	1	0	36	4	1	0	1	0	0	2	0	0	0	0	0
Ap-2012	Zone A		48	61	50	5	25	1	0	1062	1	1	0	5	0	1	0	0	0	0	0	2
Ap-2012	Zone A		49	59	50	50	5	1	0	1	1	1	0	1	0	0	0	0	0	0	0	0
Ap-2012	Zone A		50	44	25	25	75	1	0	106	3	0	0	1	0	1	0	0	0	0	0	1
Ap-2012	Zone A		51	58	50	75	5	1	0	49	0	3	0	1	0	0	0	0	1	0	0	2
Ap-2012	Zone A		52	60	25	5	5	1	0	128	1	4	0	1	0	1	0	0	0	0	0	0
Ap-2012	Zone A		53	65	50	50	5	1	0	28	1	3	0	3	0	0	0	0	0	0	0	2
Ap-2012	Zone A		54	60	25	5	5	1	0	428	1	6	0	2	0	1	1	0	0	0	0	0
Ap-2012	Zone A		55	63	25	100	50	1	0	70	1	12	0	2	0	0	0	0	0	0	0	5
Ap-2012	Zone A		56	45	25	5	75	1	0	24	1	1	0	1	0	1	0	0	0	0	0	0
Ap-2012	Zone A		57	48	25	5	25	1	0	64	1	0	0	1	0	1	0	0	0	0	0	0
Ap-2012	Zone A		58	56	25	5	5	1	0	159	1	10	0	1	0	1	1	0	0	0	0	0
Ap-2012	Zone A		59	55	25	100	5	1	0	186	0	4	0	0	0	1	0	0	0	0	0	0
Ap-2012	Zone A		60	62	25	75	25	1	0	19	0	6	0	3	0	1	1	0	0	0	0	2
Ap-2012	Zone A		61	37	50	5	100	1	0	32	0	0	0	0	0	1	0	0	0	0	0	2
Ap-2012	Zone A		62	65	25	50	5	1	0	18	0	2	0	1	0	1	0	0	0	0	0	2
Ap-2012	Zone A		63	71	50	100	25	1	0	575	0	3	0	1	0	0	2	0	0	0	0	1
Ap-2012	Zone A		64	54	25	75	5	1	0	201	1	4	0	1	0	1	2	0	0	0	0	0
Ap-2012	Zone A		65	46	25	5	5	1	0	71	1	11	0	1	0	1	0	0	0	0	0	0
Ap-2012	Zone A		66	72	25	25	5	1	0	46	1	53	0	6	0	1	0	0	0	0	0	0
Ap-2012	Zone A		67	56	50	5	100	1	0	554	1	1	0	4	0	1	0	0	0	0	0	0
Ap-2012	Zone A		68	59	50	25	75	1	0	86	1	2	0	1	0	0	0	0	0	0	0	0
Ap-2012	Zone A		69	55	25	5	5	1	0	156	2	1	0	1	0	1	0	0	0	0	0	0
Ap-2012	Zone A		70	34	50	5	25	1	0	211	1	1	0	1	0	0	0	0	0	0	0	0
Ap-2012	Zone A		71	59	25	50	100	1	0	831	1	3	0	1	0	1	0	0	0	0	0	0
Ap-2012	Zone A		72	54	25	5	25	1	0	155	1	7	0	2	0	0	0	0	0	0	0	0
Ap-2012	Zone A		73	57	25	75	100	1	0	68	1	2	0	1	0	1	0	0	0	0	0	0
Ap-2012	Zone A		74	40	25	50	100	1	0	45	4	1	0	1	0	1	0	0	0	0	0	4
Ap-2012	Zone A		75	41	25	5	5	1	0	26	1	1	0	1	0	1	0	0	0	0	0	0
Ap-2012	Zone A		76	77	25	5	25	1	0	346	1	22	0	1	0	0	0	0	0	0	0	0
Ap-2012	Zone A		77	76	25	100	5	1	0	141	1	44	0	1	0	1	0	0	0	0	0	0
Ap-2012	Zone A		78	78	25	25	75	1	0	171	3	0	0	7	0	1	0	0	0	0	0	4
Ap-2012	Zone A		79	57	25	5	5	1	0	186	1	12	0	1	0	1	0	0	0	0	0	0
Ap-2012	Zone A		80	45	25	5	5	1	0	43	2	5	0	0	0	1	0	0	0	0	0	0
Ap-2012	Zone A		PA 9	50	25	5	100	1	0	1	1	1	0	2	0	1	1	0	0	0	0	0
Ap-2012	Zone B		81	45	25	5	5	1	0	5	0	6	7	1	0	0	0	0	0	0	0	3
Ap-2012	Zone B		82	59	25	5	5	1	0	0	1	0	0	1	0	0	0	0	0	0	0	1
Ap-2012	Zone B		83	40	50	5	5	1	0	2	1	0	1	1	0	0	0	0	0	0	0	2
Ap-2012	Zone B		84	33	50	5	100	1	0	2	1	1	2	1	0	0	0	0	0	0	0	3
Ap-2012	Zone B		85	70	50	5	5	1	0	0	1	1	2	1	0	0	0	0	0	0	0	0
Ap-2012	Zone B		86	31	25	5	5	1	0	5	1	1	0	1	0	0	0	0	0	0	0	4
Ap-2012	Zone B		87	54	25	5	5	1	0	2	1	1	0	1	0	0	0	0	0	0	0	2
Ap-2012	Zone B		88	44	25	5	5	1	0	2	1	3	1	1	0	0	0	0	0	0	0	0
Ap-2012	Zone B		89	53	25	5	25	1	0	1	1	1	1	1	0	0	0	0	0	0	0	0
Ap-2012	Zone B		90	48	25	5	5	1	0	1	1	1	0	1	1	0	0	0	0	5	0	6
Ap-2012	Zone B		91	27	50	5	75	1	0	1	1	1	1	1	0	0	0	0	0	0	0	4
Ap-2012	Zone B		92	58	50	5	5	1	0	0	1	1	8	1	0	0	0	0	0	0	0	1
Ap-2012	Zone B		93	71	25	5	5	1	0	1	1	1	3	1	0	0	0	0	0	0	0	4
Ap-2012	Zone B		94	38	25	5	75	1	0	1	2	0	3	1	0	0	0	0	0	0	1	2
Ap-2012	Zone B		95	38	25	5	100	1	0	1	0	0	0	1	1	0	0	0	0	0	0	2
Ap-2012	Zone B		97	37	50	5	50	1	0	1	3	1	1	1	0	0	0	0	0	0	0	0
Ap-2012	Zone B		98	56	25	5	5	1	0	1	1	0	3	1	0	0	0	0	0	1	0	1
Ap-2012	Zone B		99	61	25	5	75	1	0	1	1	0	0	1	0	0	0	0	0	0	0	1
Ap-2012	Zone B		100	51	25	5	5	1	0	1	1	0	1	1	0	0	0	0	0	0	0	4
Ap-2012	Zone B		101	56	25	5	5	1	0	1	1	1	1	0	0	3	0	0	0	0	0	2
Ap-2012	Zone B		102	57	25	5	5	1	0	3	1	1	2	0	0	0	0	0	0	0	0	1
Ap-2012	Zone B		103	61	50	25	25	1	0	1	1	1	1	1	0	1	0	1	0	0	0	3
Ap-2012	Zone B		104	64	50	5	100	1	0	1	1	1	0	2	0	0	0	0	0	0	1	1
Ap-2012	Zone B		105	36	25	5	5	1	0	1	1	1	5	0	0	0	0	0	0	1	0	1
Ap-2012	Zone B		106	29	25	5	5	1	0	1	1	1	1	2	1	0	0	0	0	0	0	2
Ap-2012	Zone B		107	34	25	5	5	1	0	1	1	1	2	1	0	0	0	0	0	0	0	1
Ap-2012	Zone B		108	27	25	5	5	1	0	1	1	1	1	1	0	0	2	0	0	1	0	1
Ap-2012	Zone B		109	58	25	5	5	1	0	1	1	1	1	1	0	0	0	0	0	1	0	1
Ap-2012	Zone B		110	36	25	5	50	1	0	1	1	1	2	0	0	0	0	0	0	1	1	1
Ap-2012	Zone B		11	64	50	25	75	1	0	0	1	1	1	1	0	0	0	0	0	0	0	1
Ap-2012	Zone B		112	40	25	5	5	1	0	1	1	1	10	0	0	0	0	0	0	0	1	2
Ap-2012	Zone B		113	43	25	50	50	1	0	2	1	0	0	1	0	0	0	0	0	0	0	1
Ap-2012	Zone B		114	68	50	5	100	1	0	1	1	1	0	0	0	0	0	0	0	1	0	1
Ap-2012	Zone B		115	37	25	25	25	1	0	1	1	1	4	1	0	0	0	0	0	0	0	3
Ap-2012	Zone B		116	57	50	5	25	1	0	1	1	1	0	1	0	1	0	0	0	0	0	1
Ap-2012	Zone B		117	45	50	5	50	1	0	0	2	1	5	1	1	0	0	1	0	0	1	2
Ap-2012	Zone B		118	41	25	5	5	1	0	2	1	1	2	1	0	0	0	0	0	0	1	1
Ap-2012	Zone B		119	31	25	5	5	1	0	7	1	1	5	1	0	0	0	0	0	0	0	1
Ap-2012	Zone B		120	33	25	5	5	1	0	4	1	1	0	1	0	0	0	0	0	0	0	3
Ap-2012	Zone B		121	38	25	5	5	1	0	1	1	1	0	1	0	0	1	1	1	1	0	1
Ap-2012	Zone B		122	45	25	5	5	1	0	1	1	1	2	1	0	0	0	0	0	0	1	1
Ap-2012	Zone B		123	23	25	5	5	1	0	32	1	1	0	1	0	1	0	0	0	0	0	1
Ap-2012	Zone B		124	33	25	25	5	1	0	1	1	1	0	1	0	0	0	0	0	0	0	2
Ap-2012	Zone B		125	35	25	50	5	1	0	1	1	1	8	0	1	0	0	0	0	0	0	1
Ap-2012	Zone B		126	26	25	25	5	1	0	1	1	1	1	0	0	0	0	0	0	0	1	3
Ap-2012	Zone B		127	60	25	75	100	1	0	1	1	1	0	1	0	0	0	0	0	0	0	2
Ap-2012	Zone B		128	56	25	5	5	1	0	5	0	1	0	0	0	1	0	0	0	0	0	1
Ap-2012	Zone B		129	57	25	5	5	1	0	1	1	1	0	0	0	0	0	0	0	0	0	1
Ap-2013	Zone A		42	64	50	100	50	1	0	109	1	7	0	0	0	8	0	0	0	0	0	5
Ap-2013	Zone A		43	57	25	50	5	1	0	23	7	0	0	0	0	0	0	0	0	0	0	4
Ap-2013	Zone A		45	58	50	50	75	1	0	24	11	2	0	0	0	4	0	0	0	0	0	4
Ap-2013	Zone A		50	45	25	75	100	1	0	44	11	1	0	0	0	36	0	0	0	0	0	4
Ap-2013	Zone A		51	62	25	100	75	1	0	57	1	4	1	1	0	22	0	0	0	0	0	2
Ap-2013	Zone A		52	88	25	5	100	1	0	38	3	1	0	0	0	0	1	0	0	0	0	5
Ap-2013	Zone A		53	60	25	100	100	1	0	68	2	2	1	0	0	0	0	0	0	0	0	3
Ap-2013	Zone A		54	51	25	100	100	1	0	83	1	1	0	0	0	0	0	0	0	0	0	4
Ap-2013	Zone A		56	48	25	100	5	1	0	109	11	0	0	0	0	0	0	0	0	0	0	0
Ap-2013	Zone A		57	50	25	50	50	1	0	87	1	6	2	0	0	0	0	0	0	0	0	2
Ap-2013	Zone A		59	50	50	100	100	1	0	19	1	0	0	0	0	0	0	0	0	0	0	7
Ap-2013	Zone A		60	58	50	5	5	1	0	34	1	14	0	0	0	2	0	0	0	0	0	4
Ap-2013	Zone A		63	59	25	75	25	1	0	17	4	0	0	0	0	0	0	0	0	1	0	10
Ap-2013	Zone A		66	59	25	100	100	1	0	43	4	6	0	0	0	2	0	0	0	0	0	2
Ap-2013	Zone A		68	48	25	100	75	1	0	23	21	1	0	0	0	0	0	0	0	0	0	9
Ap-2013	Zone A		70	54	25	100	100	1	0	20	1	1	0	3	0	0	0	0	0	0	0	2
Ap-2013	Zone A		71	65	25	100	100	1	0	208	1	1	7	0	0	2	0	0	0	0	0	3
Ap-2013	Zone A		72	52	25	100	100	1	0	188	3	67	2	1	0	2	0	0	0	0	0	4
Ap-2013	Zone A		73	49	50	75	100	1	0	126	2	2	0	0	0	0	0	0	0	0	0	7
Ap-2013	Zone A		74	53	25	100	5	1	0	123	7	1	0	1	0	0	0	0	0	0	0	7
Ap-2013	Zone A		77	54	25	100	100	1	0	115	1	1	6	1	0	0	0	0	0	0	0	5
Ap-2013	Zone A		78	75	25	100	100	1	0	106	1	3	1	1	0	3	0	0	0	0	0	8
Ap-2013	Zone A		79	70	50	5	5	1	0	1	1	1	1	1	0	1	0	0	0	0	0	0
Ap-2013	Zone A		81	52	50	100	100	1	0	160	9	1	1	1	0	1	0	0	0	0	0	5
Ap-2013	Zone A		84	29	25	100	5	1	0	15	2	1	0	1	0	1	0	0	0	0	0	2
Ap-2013	Zone A		86	60	25	5	5	1	0	5	1	1	4	1	0	1	0	0	0	0	0	8
Ap-2013	Zone A		87	68	25	5	5	1	0	65	2	4	1	1	0	2	0	0	0	0	0	1
Ap-2013	Zone A		88	55	25	100	100	1	0	95	1	7	0	1	0	1	0	0	0	0	0	5
Ap-2013	Zone A		89	76	50	75	5	1	0	27	10	3	1	1	3	2	0	0	0	0	0	7
Ap-2013	Zone A		90	64	25	50	50	1	0	188	2	2	4	2	0	10	0	0	0	0	0	4
Ap-2013	Zone A		91	53	50	25	50	1	0	451	1	1	2	1	1	2	0	0	0	0	0	9
Ap-2013	Zone A		92	60	50	100	75	1	0	18	1	1	16	1	1	0	0	0	0	0	0	10
Ap-2013	Zone A		93	70	25	5	5	1	0	164	1	1	1	1	0	3	0	0	0	0	0	4
Ap-2013	Zone A		94	59	50	5	25	1	0	123	7	6	0	1	1	15	0	0	0	0	0	6
Ap-2013	Zone A		95	72	50	5	75	1	0	183	1	1	0	1	1	5	0	0	0	0	0	5
Ap-2013	Zone A		96	75	25	75	50	1	0	1	1	1	6	1	0	1	0	0	0	0	0	16
Ap-2013	Zone A		97	59	25	25	5	1	0	4	2	1	1	1	1	12	0	0	0	0	0	13
Ap-2013	Zone A		98	57	25	5	5	1	0	28	4	1	1	1	0	0	0	0	0	0	0	4
Ap-2013	Zone A		99	75	25	25	5	1	0	14	1	2	1	1	1	1	0	0	0	0	0	6
Ap-2013	Zone A		100	65	50	75	50	1	0	8	1	1	7	1	0	1	0	1	0	0	0	15
Ap-2013	Zone A		101	83	50	5	50	1	0	1	1	1	3	1	1	0	0	0	0	1	0	4
Ap-2013	Zone A		102	65	50	50	100	1	0	64	1	1	0	0	1	1	0	0	0	0	0	5
Ap-2013	Zone A		103	71	25	5	5	1	0	5	18	3	1	1	1	0	0	0	0	0	0	4
Ap-2013	Zone A		104	68	25	100	100	1	0	226	2	16	1	1	0	0	0	0	0	0	0	15
Ap-2013	Zone A		105	54	25	5	5	1	0	48	15	1	1	1	1	1	0	0	0	0	0	6
Ap-2013	Zone A		106	65	25	25	75	1	0	8	1	13	4	1	0	0	0	0	0	0	0	8
Ap-2013	Zone A		107	50	25	25	5	1	0	57	4	2	7	1	1	43	0	0	0	0	0	1
Ap-2013	Zone A		108	64.5	50	25	50	1	0	33	6	8	1	0	1	1	0	0	0	0	0	3
Ap-2013	Zone A		109	54	25	5	5	1	0	50	1	1	2	1	0	10	0	0	0	0	0	2
Ap-2013	Zone A		110	63	25	5	5	1	0	70	2	13	2	1	1	39	0	0	0	0	0	4
Ap-2013	Zone A		111	55	25	5	75	1	0	1	1	1	3	3	0	0	1	0	0	0	0	6
Ap-2013	Zone A		112	70	50	5	50	1	0	1	1	1	1	1	1	0	1	0	0	0	0	8
Ap-2013	Zone A		113	41	50	25	25	1	0	160	2	1	0	1	1	6	0	0	0	0	0	3
Ap-2013	Zone A		114	57	50	5	5	1	0	42	1	1	0	3	1	1	0	0	0	0	0	3
Ap-2013	Zone A		115	45	25	100	75	1	0	707	1	12	1	3	1	1	0	0	0	0	0	10
Ap-2013	Zone A		116	51	50	5	5	1	0	30	8	9	0	1	1	1	0	0	0	0	0	2
Ap-2013	Zone A		117	78	25	5	100	1	0	117	1	1	1	3	1	19	0	0	0	0	0	7
Ap-2013	Zone B		1	72	50	5	5	1	0	0	0	0	2	1	0	1	0	0	0	0	0	7
Ap-2013	Zone B		2	41	25	5	5	1	0	0	0	0	2	1	0	1	1	0	1	1	0	4
Ap-2013	Zone B		3	70	25	5	5	1	0	0	0	0	1	1	0	1	0	0	0	1	0	3
Ap-2013	Zone B		4	55	25	5	5	1	0	0	0	0	1	1	1	0	0	1	0	0	1	5
Ap-2013	Zone B		5	54	25	25	25	1	0	0	0	0	1	1	0	1	1	0	1	0	0	2
Ap-2013	Zone B		6	64	25	5	5	1	0	0	0	0	1	1	0	1	1	1	0	0	0	3
Ap-2013	Zone B		7	43	25	5	5	1	0	0	0	0	8	0	1	0	0	0	0	0	0	3
Ap-2013	Zone B		8	30	25	5	5	1	0	0	0	0	1	0	0	1	0	0	0	1	1	4
Ap-2013	Zone B		9	49	25	5	5	1	0	0	0	0	5	0	0	1	0	1	0	1	0	1
Ap-2013	Zone B		10	37	25	5	25	1	0	0	0	1	2	1	0	0	0	0	1	0	0	3
Ap-2013	Zone B		11	39	50	5	5	1	0	0	0	0	1	0	0	1	0	0	0	3	1	14
Ap-2013	Zone B		12	44	25	5	5	1	0	0	0	0	5	1	0	0	0	1	1	1	0	11
Ap-2013	Zone B		13	53	50	5	5	1	0	0	0	0	1	0	1	0	1	0	1	0	1	5
Ap-2013	Zone B		14	43	50	5	5	1	0	0	0	0	9	1	1	0	0	0	0	2	1	3
Ap-2013	Zone B		15	42	25	5	5	1	0	0	0	0	4	1	1	0	0	0	0	0	0	2
Ap-2013	Zone B		16	33	25	25	5	1	0	0	0	0	3	1	0	0	1	0	0	1	0	10
Ap-2013	Zone B		17	50	25	5	25	1	0	0	0	0	1	1	1	0	0	0	0	0	0	2
Ap-2013	Zone B		18	39	25	5	5	1	0	0	0	0	4	1	0	0	1	0	1	3	0	4
Ap-2013	Zone B		19	35	25	5	5	1	0	0	0	0	3	0	1	0	0	0	0	1	0	11
Ap-2013	Zone B		20	38	25	5	25	1	0	0	0	0	1	1	1	0	0	0	0	0	0	5
Ap-2013	Zone B		21	73	25	5	5	1	0	0	0	0	1	0	0	0	0	1	0	1	1	6
Ap-2013	Zone B		22	37	25	25	5	1	0	0	0	0	8	0	0	1	0	0	0	1	0	4
Ap-2013	Zone B		23	41	25	5	5	1	0	0	0	0	1	0	0	0	1	0	1	0	0	4
Ap-2013	Zone B		24	45	25	5	5	1	0	0	0	0	7	1	0	0	0	1	0	0	0	7
Ap-2013	Zone B		25	35	50	5	5	1	0	0	0	0	1	0	1	1	1	0	0	1	1	3
Ap-2013	Zone B		26	49	25	5	5	1	0	0	0	0	2	0	0	0	0	0	1	0	0	3
Ap-2013	Zone B		27	51	25	5	5	1	0	0	0	0	7	1	1	1	0	0	0	1	1	6
Ap-2013	Zone B		28	54	50	5	5	1	0	0	0	0	5	1	1	0	0	0	1	0	0	4
Ap-2013	Zone B		29	50	25	5	5	1	0	0	0	0	1	1	0	1	0	1	0	0	0	6
Ap-2013	Zone B		30	47	25	5	5	1	0	0	0	0	1	1	1	0	0	1	0	1	0	6
Ap-2013	Zone B		31	43	25	5	5	1	0	0	0	0	1	1	1	0	0	0	1	0	0	7
Ap-2013	Zone B		32	56	50	25	25	1	0	0	0	0	1	1	1	1	0	0	0	0	0	1
Ap-2013	Zone B		33	48	25	5	5	1	0	0	0	0	1	0	1	1	0	0	0	0	1	3
Ap-2013	Zone B		34	56	25	5	5	1	0	0	0	0	2	1	1	1	0	0	0	0	0	2
Ap-2013	Zone B		36	39	25	5	5	1	0	0	0	0	3	1	1	0	0	0	0	1	1	5
Ap-2013	Zone B		37	24	25	5	5	1	0	0	0	0	10	0	0	1	0	1	0	0	0	9
Ap-2013	Zone B		38	30	50	5	50	1	0	0	0	0	6	1	0	1	1	0	1	0	1	5
Ap-2013	Zone B		39	54	25	5	5	1	0	0	0	0	1	1	0	0	0	0	0	1	0	2
Ap-2013	Zone B		40	32	25	5	5	1	0	0	0	0	1	1	1	1	0	1	0	0	1	1
Ap-2013	Zone B		118	45	25	5	75	1	0	0	0	0	2	1	1	1	0	0	0	0	0	5
Ap-2013	Zone B		119	58	25	5	75	1	0	0	0	0	2	1	1	1	0	0	0	1	0	4
Ap-2013	Zone B		120	38	50	5	75	1	0	0	0	0	1	1	1	1	0	1	0	0	1	1
Ap-2013	Zone B		121	49	50	25	75	1	0	0	0	0	5	0	1	1	0	0	0	1	0	18
Ap-2014	Zone A		1	90	50	25	100	1	0	0	0	0	0	0	0	0	1	0	0	0	0	2
Ap-2014	Zone A		2	57	25	5	75	1	0	0	0	0	0	0	0	0	0	0	0	0	0	1
Ap-2014	Zone A		3	65	25	100	75	1	0	3	0	1	0	0	0	0	0	0	0	0	0	2
Ap-2014	Zone A		5	62	50	75	5	1	0	10	0	1	0	0	0	0	0	0	0	0	0	0
Ap-2014	Zone A		6	56	50	100	5	1	0	0	0	0	0	1	0	1	0	0	0	0	0	2
Ap-2014	Zone A		7	48	25	100	5	1	0	19	0	0	0	0	0	0	0	0	0	0	0	2
Ap-2014	Zone A		8	45	25	25	100	1	0	1	1	0	0	0	0	0	1	0	0	0	0	0
Ap-2014	Zone A		12	82	25	50	50	1	0	0	0	0	0	0	0	0	0	0	0	0	0	6
Ap-2014	Zone A		13	92	25	75	5	1	0	0	0	0	0	0	0	0	0	0	0	0	0	1
Ap-2014	Zone A		14	64	25	100	100	1	0	10	0	1	0	0	0	0	2	0	0	0	0	0
Ap-2014	Zone A		17	39	25	5	25	1	0	0	2	0	0	0	0	2	1	0	0	0	0	0
Ap-2014	Zone A		18	88	50	75	5	1	0	0	0	0	3	0	0	0	0	0	0	0	0	4
Ap-2014	Zone A		19	75	25	50	100	1	0	18	0	0	0	0	0	0	0	0	0	0	0	0
Ap-2014	Zone A		21	76	50	50	5	1	0	0	0	0	1	0	0	0	0	0	0	0	0	1
Ap-2014	Zone A		22	57	50	100	100	1	0	0	0	0	0	0	0	0	0	0	0	0	0	2
Ap-2014	Zone A		23	97	25	100	75	1	0	0	1	1	0	0	0	0	0	0	0	0	0	2
Ap-2014	Zone A		24	42	50	25	100	1	0	0	0	0	1	0	0	0	0	0	0	0	0	0
Ap-2014	Zone A		34	60	50	50	75	1	0	1	1	3	0	0	0	0	0	0	0	0	0	0
Ap-2014	Zone A		36	60	25	50	25	1	0	1	1	0	0	0	0	0	6	0	0	0	0	0
Ap-2014	Zone A		37	72	25	75	5	1	0	2	0	1	1	0	0	1	0	0	0	0	0	0
Ap-2014	Zone A		39	77	25	100	5	1	0	0	0	0	0	1	0	0	0	0	0	0	0	2
Ap-2014	Zone A		40	75	50	100	50	1	0	0	1	0	0	0	0	1	0	0	0	0	0	1
Ap-2014	Zone A		305	82	50	100	100	1	0	1	0	0	0	2	0	0	0	0	0	0	0	0
Ap-2014	Zone A		307	46	50	75	50	1	0	4	0	0	0	0	0	0	0	0	0	0	0	3
Ap-2014	Zone A		308	68	25	100	75	1	0	3	1	0	0	0	0	0	0	0	0	0	0	1
Ap-2014	Zone A		310	54	25	100	50	1	0	4	0	0	0	1	0	0	0	0	0	0	0	0
Ap-2014	Zone A		2	56	25	50	75	1	0	0	0	0	0	0	0	0	0	0	0	0	0	1
Ap-2014	Zone A		3	54	25	100	100	1	0	115	0	15	0	0	0	0	0	0	0	0	0	1
Ap-2014	Zone A		5	61	25	5	50	1	0	0	1	4	0	3	0	0	0	0	0	0	0	2
Ap-2014	Zone A		6	59	31.25	100	100	1	0	0	1	0	0	0	0	0	0	0	0	0	0	1
Ap-2014	Zone A		7	62	40	100	75	1	0	197	0	27	0	0	0	0	0	0	0	0	0	5
Ap-2014	Zone A		8	40	25	75	5	1	0	1	0	0	0	0	0	0	0	0	0	0	0	3
Ap-2014	Zone A		9	91	30	5	25	1	0	12	3	0	0	0	0	0	0	0	0	0	0	1
Ap-2014	Zone A		10	94.5	43.75	5	50	1	0	5	5	0	0	0	0	1	0	0	0	0	0	0
Ap-2014	Zone A		11	70	35	5	75	1	0	1	0	0	0	0	0	0	0	0	0	0	0	0
Ap-2014	Zone A		13	69.5	25	50	5	1	0	30	1	4	0	0	0	0	0	0	0	0	0	3
Ap-2014	Zone A		14	53	35	100	100	1	0	5	1	0	0	0	0	5	0	0	0	0	0	0
Ap-2014	Zone A		15	75	43.75	5	5	1	0	5	0	0	0	4	0	1	0	0	0	0	0	3
Ap-2014	Zone A		16	70	35	100	100	1	0	0	2	0	3	0	0	0	0	0	0	0	0	3
Ap-2014	Zone A		17	53	37.5	100	100	1	0	19	1	31	0	0	0	0	0	0	0	0	0	1
Ap-2014	Zone A		19	74	40	100	75	1	0	230	0	20	0	0	0	0	0	0	0	0	0	4
Ap-2014	Zone A		20	58	31.25	50	50	1	0	0	0	0	0	0	0	4	0	0	0	0	0	0
Ap-2014	Zone A		23	56	35	50	75	1	0	1	0	0	0	0	0	0	0	0	0	0	0	2
Ap-2014	Zone A		26	57	29.1667	100	100	1	0	219	0	7	0	2	0	0	0	0	0	0	0	3
Ap-2014	Zone A		27	50	41.6667	100	100	1	0	5	5	0	0	0	0	0	0	0	0	0	0	2
Ap-2014	Zone A		28	74	50	100	75	1	0	0	0	0	0	0	0	0	1	0	0	0	0	2
Ap-2014	Zone A		29	65	50	75	75	1	0	215	3	46	0	0	0	0	0	0	0	0	0	1
Ap-2014	Zone A		31	59	50	75	25	1	0	123	1	0	0	0	0	0	0	0	0	0	0	2
Ap-2014	Zone A		32	68	50	100	100	1	0	0	1	0	0	0	0	0	0	0	0	0	0	1
Ap-2014	Zone A		34	64.5	25	100	100	1	0	52	0	0	0	0	0	0	0	0	0	0	0	2
Ap-2014	Zone A		36	69	25	50	50	1	0	23	2	8	0	0	0	0	0	0	0	0	0	2
Ap-2014	Zone A		37	76	50	100	25	1	0	58	0	2	0	2	0	0	1	0	0	0	0	4
Ap-2014	Zone A		38	75	50	5	50	1	0	2	5	0	0	0	0	0	0	0	0	0	0	1
Ap-2014	Zone A		39	67	50	100	75	1	0	24	0	23	0	4	0	0	0	0	0	0	0	4
Ap-2014	Zone A		292	70	25	100	25	1	0	202	0	13	0	1	0	0	0	0	0	0	0	0
Ap-2014	Zone A		310	73	25	5	5	1	0	136	1	7	0	0	0	0	0	0	0	0	0	1
Ap-2014	Zone B		1	45	25	25	5	1	0	0	0	0	1	0	0	0	1	0	0	0	0	0
Ap-2014	Zone B		2	52	25	75	25	1	0	0	0	0	5	0	0	0	0	0	0	0	0	2
Ap-2014	Zone B		3	77	25	100	75	1	0	0	0	1	2	0	0	0	0	0	0	0	0	2
Ap-2014	Zone B		4	41	25	100	5	1	0	0	0	1	3	0	0	2	0	0	0	0	0	1
Ap-2014	Zone B		6	44	25	50	5	1	0	0	0	0	1	0	0	0	0	0	0	0	0	0
Ap-2014	Zone B		7	50	25	25	75	1	0	0	0	1	0	0	0	0	0	0	0	0	0	2
Ap-2014	Zone B		8	49.5	25	75	75	1	0	0	0	0	0	0	0	0	0	0	0	0	0	0
Ap-2014	Zone B		10	65	25	100	5	1	0	0	0	0	1	0	0	0	0	0	0	0	0	3
Ap-2014	Zone B		11	75	25	75	25	1	0	0	0	0	1	1	0	0	0	0	0	0	0	1
Ap-2014	Zone B		12	57	25	50	50	1	0	0	0	0	0	0	0	0	0	0	0	0	0	2
Ap-2014	Zone B		14	49	25	75	25	1	0	0	0	0	2	0	0	0	0	0	0	0	0	0
Ap-2014	Zone B		15	61	25	50	5	1	0	0	0	0	1	0	0	0	0	0	0	0	0	3
Ap-2014	Zone B		16	41	25	75	5	1	0	0	0	0	0	0	0	7	0	0	0	0	0	0
Ap-2014	Zone B		18	57	25	5	5	1	0	0	0	0	0	0	0	0	0	0	0	0	0	2
Ap-2014	Zone B		19	54	25	25	50	1	0	0	0	0	2	0	0	0	0	0	0	0	0	2
Ap-2014	Zone B		20	61	25	5	5	1	0	0	0	0	1	0	0	0	0	0	0	0	0	0
Ap-2014	Zone B		21	50	25	50	5	1	0	0	0	0	3	0	0	0	0	0	0	0	0	2
Ap-2014	Zone B		22	48	25	100	5	1	0	0	0	0	9	0	0	30	0	0	0	0	0	1
Ap-2014	Zone B		23	50	25	25	50	1	0	0	0	0	0	0	0	0	0	0	0	0	0	3
Ap-2014	Zone B		24	65	25	75	5	1	0	0	0	1	8	0	0	0	0	0	0	0	0	2
Ap-2014	Zone B		25	61	25	100	100	1	0	0	0	0	19	0	0	0	0	0	0	0	0	3
Ap-2014	Zone B		26	43	25	75	50	1	0	0	0	0	1	2	0	0	0	0	0	0	0	2
Ap-2014	Zone B		27	74	25	5	5	1	0	0	0	0	0	0	0	0	0	0	0	0	0	1
Ap-2014	Zone B		28	60	25	75	25	1	0	0	0	0	1	0	0	0	0	0	0	0	0	0
Ap-2014	Zone B		30	45	25	100	5	1	0	0	0	0	1	0	0	0	0	0	0	0	0	2
Ap-2014	Zone B		31	46	25	100	5	1	0	0	0	0	1	0	0	0	0	0	0	0	0	0
Ap-2014	Zone B		32	52	25	25	5	1	0	0	0	0	0	1	0	0	0	0	0	0	0	2
Ap-2014	Zone B		33	46	25	25	5	1	0	0	0	0	8	0	0	0	0	0	0	0	0	1
Ap-2014	Zone B		34	44	25	50	5	1	0	0	0	2	1	0	0	0	0	0	0	0	0	1
Ap-2014	Zone B		37	70	25	75	25	1	0	0	0	0	1	0	0	0	0	0	0	0	0	0
Ap-2014	Zone B		38	52	25	5	50	1	0	0	0	0	2	0	0	0	0	0	0	0	0	0
Ap-2014	Zone B		39	57	25	25	25	1	0	0	0	0	1	0	0	0	0	0	0	0	0	0
Ap-2014	Zone B		40	58	25	5	50	1	0	0	0	0	2	1	0	0	0	0	0	0	0	3
Ap-2014	Zone B		291	59	25	25	5	1	0	0	0	0	3	0	0	0	0	0	0	0	0	1
Ap-2014	Zone B		292	60	25	100	5	1	0	0	0	1	3	0	0	0	0	0	0	0	0	3
Ap-2014	Zone B		294	36	25	50	5	1	0	0	0	0	2	0	0	1	0	0	0	0	0	0
Ap-2014	Zone B		305	51	25	5	5	1	0	0	0	0	0	0	0	0	0	0	0	0	0	0
Ap-2014	Zone B		306	33	25	25	5	1	0	0	0	0	1	0	0	1	0	0	0	0	0	2
Ap-2014	Zone B		307	54	25	5	50	1	0	0	0	1	0	0	0	0	0	0	0	0	0	0
Ap-2014	Zone B		308	61	25	5	5	1	0	0	0	0	0	0	0	0	0	0	0	0	0	1

## Sheet: Intact pools
Data	Piscina	Fykenet code No.	Prof. (cm)	Slope	Sub veg (%)	Rip Veg (%)	Nat. subs	Art. Subs	AIB	PMI	ABO	SAU	AAN	SPA	Mug.	SAB	DLA	GAM	SYA	Gb sp	LRA	CAR
Ap-2011	B2	1	49	50	5	50	1	0	217	0	0	0	0	0	0	0	0	0	0	0	0	0
Ap-2011	B2	2	51.5	50	5	50	1	0	130	0	0	0	0	0	0	0	0	0	0	0	0	0
Ap-2011	B2	3	53	50	5	25	1	0	183	0	0	0	0	0	0	0	0	0	0	0	0	0
Ap-2011	B3	1	47	50	5	75	1	0	1449	0	0	0	0	0	0	0	0	0	0	0	0	0
Ap-2011	B3	2	38	50	5	75	1	0	1267	0	0	0	0	0	0	0	0	0	0	0	0	0
Ap-2011	B3	3	44	50	5	25	1	0	262	0	0	0	0	0	0	0	0	0	0	0	0	0
Ap-2011	B4	1	66	50	100	100	1	0	158	30	20	0	0	0	2	1	0	0	0	0	0	0
Ap-2011	B4	2	62	50	100	75	1	0	158	59	76	0	0	0	6	1	0	0	0	0	0	0
Ap-2011	B4	3	43	50	75	100	1	0	129	28	29	1	0	0	4	0	0	0	0	0	0	0
Ap-2011	C9	1	56	50	50	75	1	0	505	101	0	0	0	0	0	0	0	0	0	0	0	1
Ap-2011	C9	2	39	25	100	75	1	0	292	39	0	0	0	0	0	0	0	0	0	0	0	0
Ap-2011	C9	3	41	25	100	100	1	0	299	17	0	0	1	0	0	0	0	0	0	0	0	0
Ap-2011	C10	1	37	25	5	75	1	0	121	0	0	0	0	0	0	0	0	0	0	0	0	0
Ap-2011	C10	2	34	25	5	100	1	0	160	0	0	0	0	0	0	0	0	0	0	0	0	0
Ap-2011	C10	3	40	25	5	100	1	0	56	0	0	0	0	0	0	0	0	0	0	0	0	0
Ap-2011	C11	1	39.5	50	5	100	1	0	25	0	0	0	0	0	0	0	0	0	0	0	0	0
Ap-2011	C11	2	39.8	50	5	100	1	0	24	0	0	0	0	0	0	0	0	0	0	0	0	0
Ap-2011	C11	3	39.1	50	5	100	1	0	25	0	0	0	0	0	0	0	0	0	0	0	0	0
Ap-2012	B2	40	59	50	25	75	1	0	12	0	0	0	0	0	0	0	0	0	0	0	0	0
Ap-2012	B2	28	68	50	5	100	1	0	82	1	0	0	4	0	6	0	0	0	0	0	0	1
Ap-2012	B2	10	50	50	50	50	1	0	1	5	0	0	1	0	0	0	0	0	0	0	0	0
Ap-2012	B3	9	78	50	25	75	1	0	15	13	2	0	0	0	0	0	0	0	0	0	0	2
Ap-2012	B3	11	45	25	5	100	1	0	4	0	0	0	0	0	0	0	0	0	0	0	0	1
Ap-2012	B3	30	59	50	5	75	1	0	13	7	0	0	0	0	0	0	0	0	0	0	0	1
Ap-2012	B4	24	59	50	5	25	1	0	2	4	0	0	0	0	0	0	0	0	0	0	0	0
Ap-2012	B4	31	51	50	5	100	1	0	76	6	0	0	0	0	0	0	0	0	0	0	0	0
Ap-2012	B4	19	45	25	25	25	1	0	5	2	0	0	0	0	0	0	0	0	0	0	0	1
Ap-2012	C9	20	42	25	50	75	1	0	2	0	0	0	0	0	1	0	0	0	0	0	0	0
Ap-2012	C9	26	41	25	5	25	1	0	3	0	0	0	0	0	0	0	0	0	0	0	0	1
Ap-2012	C9	27	35	25	5	5	1	0	12	0	0	0	0	0	0	0	0	0	0	0	0	0
Ap-2012	C10	21	27	25	5	5	1	0	70	8	0	0	0	0	0	0	0	0	0	0	0	0
Ap-2012	C10	23	53	25	5	5	1	0	1	0	0	0	0	0	0	0	0	0	0	0	0	0
Ap-2012	C10	25	59	50	5	5	1	0	35	0	0	0	2	0	5	0	0	0	0	0	0	0
Ap-2012	C11	29	57	50	25	100	1	0	2	0	0	0	0	0	0	0	0	0	0	0	0	0
Ap-2012	C11	13	50	25	25	50	1	0	5	9	0	0	0	0	0	0	0	0	0	0	0	0
Ap-2012	C11	22	51	25	25	75	1	0	29	13	0	0	0	0	0	0	0	0	0	0	0	0
Ap-2013	B2	44	78	25	5	75	1	0	3	10	0	4	0	0	1	0	0	0	0	0	0	10
Ap-2013	B2	46	52	25	50	50	1	0	1	2	0	4	13	1	0	0	0	0	0	0	0	19
Ap-2013	B2	82	80	25	5	25	1	0	0	0	0	1	0	2	0	0	0	0	0	0	0	10
Ap-2013	B3	85	90	50	5	75	1	0	6	9	0	0	0	0	5	0	0	0	0	0	0	10
Ap-2013	B3	83	74	50	5	75	1	0	0	0	0	0	0	0	0	1	0	0	0	0	0	3
Ap-2013	B3	65	70	25	5	75	1	0	2	9	5	1	2	0	4	0	0	0	0	1	0	6
Ap-2013	B4	47	70	50	50	75	1	0	1	46	1	0	0	0	31	0	0	0	0	0	0	5
Ap-2013	B4	48	82	25	25	25	1	0	1	6	2	0	0	0	8	1	0	0	0	0	0	11
Ap-2013	B4	55	90	50	5	100	1	0	1	17	2	0	1	0	22	0	0	0	0	0	0	5
Ap-2013	C9	41	74	25	100	50	1	0	266	0	3	0	4	0	0	0	0	0	0	0	0	5
Ap-2013	C9	61	56	50	100	100	1	0	141	0	1	0	0	0	0	0	0	0	0	0	0	5
Ap-2013	C9	67	80	50	25	75	1	0	41	0	7	0	9	0	0	0	0	0	0	0	0	0
Ap-2013	C10	58	102	25	75	50	1	0	1	2	0	4	0	1	1	0	0	0	0	0	0	4
Ap-2013	C10	80	98	50	5	75	1	0	1	0	0	1	0	0	1	0	0	0	0	0	0	7
Ap-2013	C10	62	60	25	75	25	1	0	4	1	1	2	0	0	0	0	0	0	0	0	0	7
Ap-2013	C11	64	46	50	5	100	1	0	452	0	0	0	0	0	0	0	0	0	0	0	0	0
Ap-2013	C11	76	60	50	5	50	1	0	265	0	0	0	0	0	0	0	0	0	0	0	0	0
Ap-2013	C11	49	69	50	5	100	1	0	325	0	0	0	0	0	0	0	0	0	0	0	0	0
Ap-2014	B2	11	54	30	25	5	1	0	1	0	3	2	0	0	1	1	0	0	0	0	0	1
Ap-2014	B2	15	59	40	100	50	1	0	12	1	1	1	0	0	0	2	0	0	0	0	0	0
Ap-2014	B2	32	58	30	5	100	1	0	0	0	0	0	0	0	0	0	0	0	0	0	0	0
Ap-2014	B3	38	43	40	100	5	1	0	1	0	0	1	0	0	0	0	0	0	0	0	0	0
Ap-2014	B3	4	88	40	100	5	1	0	1	1	0	0	0	0	0	0	0	0	0	0	0	2
Ap-2014	B3	9	27	40	50	5	1	0	1	0.5	0	0.5	0	0	0	0	0	0	0	0	0	1
Ap-2014	B4	18	77	25	5	5	1	0	0	0	0	1	0	0	0	0	0	0	0	0	0	1
Ap-2014	B4	30	90	50	5	5	1	0	18	13	1	0	0	0	0	0	0	0	0	0	0	1
Ap-2014	B4	33	78	25	5	75	1	0	43	3	2	0	0	0	0	0	0	0	0	0	0	1
Ap-2014	C9	25	67	25	5	25	1	0	1	0	0	0	0	0	0	0	0	0	0	0	0	3
Ap-2014	C9	28	71	25	100	75	1	0	2	0	1	0	0	0	0	0	0	0	0	0	0	0
Ap-2014	C9	10	64	30	100	25	1	0	0	2	0	0	0	0	1	1	0	0	0	0	0	0
Ap-2014	C10	26	59	35	100	100	1	0	3	0	0	0	0	0	6	0	0	0	0	0	0	7
Ap-2014	C10	29	55	35	50	5	1	0	2	2	1	1	0	0	1	0	0	0	0	0	0	0
Ap-2014	C10	31	75	35	5	50	1	0	3	0	0	0	0	0	0	0	0	0	0	0	0	1
Ap-2014	C11	27	50	50	50	100	1	0	715	0	0	0	0	0	0	0	0	0	0	0	0	0
Ap-2014	C11	30	63	30	5	100	1	0	385	0	0	0	0	0	0	0	0	0	0	0	0	0
Ap-2014	C11	292	63	50	5	100	1	0	248	0	0	0	0	0	0	0	0	0	0	0	0	0

## Sheet: Distance and F-Q
					Dist_2_sea	Temp	ODO Conc	Salinity	pH
Year	Zone	Pool	X	Y		C	mg/L	ppt
Ap-2011	Zone A	B1			721.36	20.57	7.22	39.72	8.03
Ap-2011	Zone A	B2			734.9	20.61	6.53	59.68	8.01
Ap-2011	Zone A	B3			756	20.29	5.80	63.70	7.89
Ap-2011	Zone A	B4			777.91	20.34	8.69	46.45	8.41
Ap-2011	Zone A	B5			788.28	21.16	13.86	40.30	9.22
Ap-2011	Zone A	B6			791.63	25.42	9.72	54.33	7.87
Ap-2011	Zone A	B7			805.35	20.82	7.93	35.40	8.64
Ap-2011	Zone A	B8			821.21	20.80	5.94	57.22	8.01
Ap-2011	Zone A	B9			832.23	21.14	9.85	32.05	8.24
Ap-2011	Zone A	B10			806.81	21.54	5.68	38.46	7.73
Ap-2011	Zone A	B11			792.61	21.72	1.98	37.37	7.49
Ap-2011	Zone A	B12			765.09	21.31	6.77	37.66	7.97
Ap-2011	Zone A	B13			738.58	20.87	2.84	38.09	7.44
Ap-2011	Zone A	B14			714.95	21.28	9.07	32.34	8.23
Ap-2011	Zone A	C1			565.71	20.47	10.54	30.92	8.69
Ap-2011	Zone A	C2			585.89	20.52	5.83	31.07	8.22
Ap-2011	Zone A	C3			608.84	20.65	6.53	31.89	8.73
Ap-2011	Zone A	C4			636.03	20.43	7.92	35.62	8.76
Ap-2011	Zone A	C5			656.82	20.38	4.83	32.48	7.70
Ap-2011	Zone A	C6			680.01	20.90	7.57	33.82	8.31
Ap-2011	Zone A	C7			659.59	20.22	5.82	31.96	7.96
Ap-2011	Zone A	C8			635.34	20.67	7.21	34.55	8.60
Ap-2011	Zone A	C9			611.82	20.10	6.89	35.87	8.21
Ap-2011	Zone A	C10			585.81	20.53	5.64	78.65	7.91
Ap-2011	Zone A	C11			563.16	20.22	6.16	69.79	7.97
Ap-2011	Zone A	D1			431.67	20.49	7.22	36.33	8.00
Ap-2011	Zone A	D2			465.16	19.92	3.76	58.45	7.82
Ap-2011	Zone A	D3			490.3	19.72	6.43	31.34	7.93
Ap-2011	Zone A	D4			527.06	20.22	5.39	70.61	7.98
Ap-2011	Zone A	D5			557.21	20.34	6.30	80.46	8.07
Ap-2011	Zone A	D6			536.69	20.26	6.25	76.26	8.01
Ap-2011	Zone A	D7			493.17	20.86	6.01	53.49	8.07
Ap-2011	Zone A	D8			471.59	20.87	9.89	32.93	8.58
Ap-2011	Zone B	E1			413.43	19.62	8.58	32.10	8.30
Ap-2011	Zone B	E2			333.69	19.31	5.95	34.99	7.91
Ap-2011	Zone B	E3			373.56	19.05	4.36	34.57	7.51
Ap-2011	Zone B	E4			388.5	19.23	7.41	33.85	8.25
Ap-2011	Zone B	E5			403.51	19.30	7.47	45.89	8.87
Ap-2011	Zone B	E6			446.7	19.25	8.11	33.41	8.55
Ap-2011	Zone B	E7			420.68	19.39	7.91	33.10	8.49
Ap-2011	Zone B	E8			399.98	18.75	7.13	32.92	8.82
Ap-2011	Zone B	E9			401	19.39	7.66	32.12	8.20
Ap-2011	Zone B	E10			368.06	19.35	7.86	32.49	8.44
Ap-2011	Zone B	E11			322.31	19.03	7.28	33.64	8.21
Ap-2011	Zone B	E12			352.01	19.42	3.18	33.59	7.60
Ap-2011	Zone B	E13			345.2	18.90	14.52	33.79	8.55
Ap-2011	Zone B	F1			183.21	19.83	7.66	34.53	8.44
Ap-2011	Zone B	F2			207.96	19.52	6.85	34.19	8.03
Ap-2011	Zone B	F3			233.71	19.40	7.05	33.65	8.36
Ap-2011	Zone B	F4			253.06	19.30	6.21	34.69	7.95
Ap-2011	Zone B	F5			275.78	19.33	5.45	33.45	8.02
Ap-2011	Zone B	F6			304.16	19.48	2.90	49.77	7.56
Ap-2011	Zone B	F7			326.88	19.17	5.17	33.56	7.70
Ap-2011	Zone B	F8			332.75	19.48	6.69	34.39	8.15
Ap-2011	Zone B	F9			280.19	19.72	3.31	52.10	7.67
Ap-2011	Zone B	F10			269.17	19.40	7.03	33.53	8.45
Ap-2011	Zone B	F11			248.42	18.89	6.73	34.66	8.41
Ap-2011	Zone B	F12			225.62	19.38	7.11	33.88	8.23
Ap-2011	Zone B	F13			195.78	19.44	7.88	33.35	8.36
Ap-2012	Zone A		309026	4501889	856	15.53	8.64	45.46	8.21
Ap-2012	Zone A		309052	4501885	809	15.55	9.30	47.50	8.25
Ap-2012	Zone A		309073	4501877	782	15.87	8.67	46.31	8.24
Ap-2012	Zone A		309095	4501873	777	15.14	9.23	44.24	8.27
Ap-2012	Zone A		309092	4501794	669	14.60	9.32	41.14	8.32
Ap-2012	Zone A		309081	4501784	723	13.97	11.03	39.66	8.44
Ap-2012	Zone A		309060	4501795	741	13.81	10.21	39.93	8.48
Ap-2012	Zone A		309040	4501799	709	14.03	10.00	40.56	8.44
Ap-2012	Zone A		309009	4501809	718	13.66	9.72	42.28	8.51
Ap-2012	Zone A		308975	4501817	722	13.52	9.61	42.34	8.52
Ap-2012	Zone A		308928	4501834	734	13.73	10.09	42.46	8.54
Ap-2012	Zone A		308910	4501838	745	14.07	10.13	46.54	8.89
Ap-2012	Zone A		308882	4501846	668	14.75	8.78	47.77	8.43
Ap-2012	Zone A		308855	4501851	670	14.55	6.64	104.13	8.35
Ap-2012	Zone A		308861	4501877	636	14.17	10.17	42.99	8.62
Ap-2012	Zone A		308909	4501862	690	13.87	9.45	42.99	8.66
Ap-2012	Zone A		308952	4501848	727	13.87	9.67	43.12	8.61
Ap-2012	Zone A		308969	4501844	755	14.12	9.58	44.40	8.55
Ap-2012	Zone A		308989	4501840	794	15.31	8.97	43.09	8.53
Ap-2012	Zone A		308761	4501723	519	15.67	9.57	41.51	7.99
Ap-2012	Zone A		308811	4501674	564	15.46	9.50	41.48	8.02
Ap-2012	Zone A		308858	4501672	599	14.18	9.48	42.95	8.13
Ap-2012	Zone A		308869	4501673	699	14.35	9.66	43.08	8.29
Ap-2012	Zone A		308902	4501706	702	15.72	9.43	43.21	8.38
Ap-2012	Zone A		308930	4501709	690	14.24	9.95	43.10	8.43
Ap-2012	Zone A		308957	4501693	616	15.43	10.35	43.19	8.42
Ap-2012	Zone A		308962	4501689	603	16.65	9.60	43.15	8.39
Ap-2012	Zone A		308894	4501605	701	16.11	9.49	43.27	7.77
Ap-2012	Zone A		309099	4501762	648	18.76	10.19	39.93	8.21
Ap-2012	Zone B		308906	4501444	321	17.65	10.69	34.96	8.22
Ap-2012	Zone B		308791	4501488	362	16.25	10.60	37.32	8.26
Ap-2012	Zone B		308717	4501515	293	15.98	10.30	36.93	8.19
Ap-2012	Zone B		308639	4501544	258	15.92	9.81	36.93	8.20
Ap-2012	Zone B		308595	4501433	220	15.72	8.99	36.37	8.21
Ap-2012	Zone B		308669	4501406	208	16.22	9.29	36.63	8.23
Ap-2012	Zone B		308787	4501353	253	16.10	10.40	37.06	8.43
Ap-2012	Zone B		308862	4501324	169	16.32	10.07	37.29	8.33
Ap-2012	Zone B		308853	4501261	163	15.96	9.72	36.79	8.37
Ap-2012	Zone B		309195	4501256	211	21.94	9.21	18.00	8.13
Ap-2013	Zone A		308705	4501492	466	21.71	10.02	36.97	8.50
Ap-2013	Zone A		308740	4501455	553	19.99	7.82	37.64	8.39
Ap-2013	Zone A		308766	4501431	713	19.70	6.61	37.85	8.03
Ap-2013	Zone A		308793	4501410	687	20.16	7.79	39.64	8.09
Ap-2013	Zone A		308831	4501398	657	19.66	7.51	38.85	8.04
Ap-2013	Zone A		308894	4501472	589	19.80	6.80	39.66	7.97
Ap-2013	Zone A		308909	4501495	634	20.63	7.04	41.00	8.15
Ap-2013	Zone A		308882	4501498	621	19.68	6.36	39.61	7.93
Ap-2013	Zone A		308862	4501505	645	20.03	6.50	39.90	7.89
Ap-2013	Zone A		308817	4501500	701	20.64	6.04	39.47	7.93
Ap-2013	Zone A		308795	4501523	766	19.62	5.56	39.40	7.94
Ap-2013	Zone A		308774	4501530	972	19.23	8.42	40.07	8.47
Ap-2013	Zone A		308749	4501519	562	23.12	8.60	37.17	8.41
Ap-2013	Zone A		308743	4501538	800	19.96	7.15	38.79	8.09
Ap-2013	Zone A		308722	4501544	771	19.73	4.89	85.06	7.95
Ap-2014	Zone A		308914	4501695	847	15.57	5.12	38.04	8.14
Ap-2013	Zone A		308970	4501684	825	16.17	6.22	39.85	8.39
Ap-2013	Zone A		308989	4501665	790	16.11	5.50	38.89	8.10
Ap-2013	Zone A		308992	4501662	780	16.05	6.00	39.83	8.16
Ap-2013	Zone A		309015	4501569	668	14.82	5.60	36.58	7.92
Ap-2013	Zone A		308987	4501588	684	15.02	4.17	40.35	7.76
Ap-2013	Zone A		308971	4501593	693	15.06	4.63	40.43	7.82
Ap-2013	Zone A		308929	4501605	724	14.81	5.77	38.49	7.84
Ap-2013	Zone A		308885	4501621	771	14.96	5.69	38.53	7.83
Ap-2013	Zone A		308836	4501641	719	15.19	5.39	39.25	7.83
Ap-2013	Zone A		308798	4501634	751	15.64	5.90	39.91	8.26
Ap-2013	Zone A		308791	4501635	692	15.48	5.81	37.94	7.95
Ap-2013	Zone A		308760	4501657	644	16.19	3.85	84.94	7.92
Ap-2013	Zone A		308798	4501674	750	15.21	5.23	37.13	8.01
Ap-2013	Zone A		308806	4501725	702	15.32	4.95	37.16	8.04
Ap-2013	Zone A		308871	4501701	773	15.46	5.04	37.23	8.09
Ap-2013	Zone B		308577	4501335	258	19.61	7.55	35.18	8.05
Ap-2013	Zone B		308555	4501255	236	19.38	7.52	35.20	8.07
Ap-2013	Zone B		308611	4501226	273	19.35	7.60	35.33	8.09
Ap-2013	Zone B		308672	4501291	400	19.32	7.39	35.28	8.07
Ap-2013	Zone B		308736	4501258	363	19.65	6.99	35.67	8.11
Ap-2013	Zone B		308718	4501149	285	19.67	7.30	35.20	8.16
Ap-2013	Zone B		308760	4501140	257	19.63	7.11	35.50	8.16
Ap-2013	Zone B		308765	4501064	115	19.52	6.91	35.36	8.18
Ap-2013	Zone B		308824	4501225	304	18.70	6.50	35.79	8.15
Ap-2013	Zone B		308775	4501244	322	18.92	6.88	35.72	8.15
Ap-2013	Zone B		308843	4501239	346	20.30	7.16	36.40	8.18
Ap-2013	Zone B		308797	4501252	327	21.08	7.33	35.87	8.21
Ap-2013	Zone B		308833	4501337	410	19.92	7.33	36.45	8.15
Ap-2013	Zone B		308780	4501385	467	19.31	7.18	35.23	8.11
Ap-2013	Zone B		308731	4501353	472	19.65	7.26	35.40	8.12
Ap-2013	Zone B		308706	4501435	425	20.37	6.89	35.54	8.10
Ap-2013	Zone B		308695	4501369	404	19.84	7.16	35.30	8.13
Ap-2014	Zone A		308875	4501379	678.54	22.56	13.11	36.16	8.28
Ap-2014	Zone A		308861	4501375	675.42	22.38	10.34	36.60	8.11
Ap-2014	Zone A		308833	4501383	682.86	23.07	10.63	36.54	8.17
Ap-2014	Zone A		308813	4501396	708.13	22.92	10.35	36.44	8.17
Ap-2014	Zone A		308783	4501442	712.28	22.42	8.18	36.68	8.10
Ap-2014	Zone A		308767	4501455	734.64	22.73	8.58	36.49	8.11
Ap-2014	Zone A		308754	4501464	663.66	22.22	9.28	35.98	8.16
Ap-2014	Zone A		308730	4501483	632.61	23.33	9.94	35.96	8.23
Ap-2014	Zone A		308706	4501502	603.95	22.04	9.84	35.95	8.15
Ap-2014	Zone A		308666	4501518	602.16	22.06	9.01	36.05	8.11
Ap-2014	Zone A		308692	4501543	582.43	23.61	12.53	36.45	8.33
Ap-2014	Zone A		308701	4501549	583.85	22.10	6.04		7.73
Ap-2014	Zone A		308733	4501522	639.73	24.52	12.05	36.04	8.38
Ap-2014	Zone A		308739	4501537	884.3	21.50	8.22	36.22	8.10
Ap-2014	Zone A		308762	4501532	907.44	21.46	9.60	38.15	8.19
Ap-2014	Zone A		308769	4501519	693.74	22.72	9.71	36.04	8.24
Ap-2014	Zone A		308789	4501520	937.5	21.75	8.49	37.25	8.11
Ap-2014	Zone A		308802	4501500	773.36	23.01	9.00	37.07	8.18
Ap-2014	Zone A		308813	4501514	745.67	23.32	9.43	37.07	8.22
Ap-2014	Zone A		308831	4501500	710.47	23.38	9.33	37.10	8.20
Ap-2014	Zone A		308838	4501506	658.47	23.31	9.39	37.12	8.23
Ap-2014	Zone A		308855	4501502	618.4	21.87	9.19	36.66	8.15
Ap-2014	Zone A		308868	4501488	601.88	22.44	9.41	36.90	8.18
Ap-2014	Zone A		308918	4501584	706.23	22.17	8.68	36.81	8.16
Ap-2014	Zone A		308899	4501595	700.35	22.31	9.62	37.15	8.21
Ap-2014	Zone A		308881	4501611	726.86	22.80	9.51	37.10	8.23
Ap-2014	Zone A		308854	4501625	735.86	22.75	9.66	37.07	8.23
Ap-2014	Zone A		308840	4501622	818.83	22.79	8.60	37.34	8.18
Ap-2014	Zone A		308817	4501638	766.93	22.84	9.51	37.76	8.25
Ap-2014	Zone A		308794	4501648	751.79	22.26	8.19	36.35	8.11
Ap-2014	Zone A		308757	4501655	731.17	22.73	5.98		7.76
Ap-2014	Zone A		308791	4501722	752.98	24.72	11.12	39.50	8.13
Ap-2014	Zone A		308772	4501686	825.21	24.62	12.36	39.61	8.20
Ap-2014	Zone A		308796	4501678	825.48	24.01	10.60	39.61	8.13
Ap-2014	Zone A		308816	4501673	844.94	24.37	9.59	39.57	8.12
Ap-2014	Zone A		308832	4501668	846.74	24.38	10.70	39.52	8.15
Ap-2014	Zone A		308853	4501673	856.91	23.58	8.93	39.43	8.05
Ap-2014	Zone A		308873	4501659	852.25	23.04	9.71	39.34	8.06
Ap-2014	Zone A		308886	4501646	903.98	23.48	8.72	39.57	8.01
Ap-2014	Zone A		308903	4501644	892.37	25.50	12.05	39.27	8.18
Ap-2014	Zone A		308917	4501638	918.16	26.59	11.65	39.09	8.26
Ap-2014	Zone A		308935	4501633	970.37	25.81	9.53	38.80	8.10
Ap-2014	Zone A		308945	4501632	881.43	23.41	10.01	38.26	7.96
Ap-2014	Zone A		308970	4501625	835.86	22.91	6.10	38.02	7.52
Ap-2014	Zone A		308980	4501625	823.68	23.64	5.32	37.69	7.56
Ap-2014	Zone A		309017	4501567	679.05	27.35	12.04	38.70	8.49
Ap-2014	Zone A		308985	4501587	682.71	25.26	8.92	38.38	8.09
Ap-2014	Zone A		308969	4501590	683.87	24.76	9.05	38.17	8.04
Ap-2014	Zone A		308947	4501600	702.97	24.29	8.32	38.02	7.99
Ap-2014	Zone A		308923	4501536	636.69	23.49	8.07	37.92	7.96
Ap-2014	Zone A		308935	4501519	617.89	23.29	8.04	38.12	7.96
Ap-2014	Zone A		308952	4501510	602.56	23.28	9.07	38.02	8.04
Ap-2014	Zone A		309006	4501655	748.69	23.36	5.93	37.62	7.62
Ap-2014	Zone A		308987	4501672	802.58	23.69	5.85	38.07	7.62
Ap-2014	Zone A		308966	4501678	817.12	23.94	8.28	38.45	7.98
Ap-2014	Zone A		308945	4501684	922.93	25.88	11.61	39.10	8.30
Ap-2014	Zone A		308923	4501699	925.29	24.06	8.19	39.24	8.05
Ap-2014	Zone A		308904	4501700	904.51	23.47	8.11	39.37	8.04
Ap-2014	Zone A		308881	4501706	851.62	23.49	9.41	39.89	8.13
Ap-2014	Zone A		308861	4501716	840.93	24.73	11.82	39.70	8.30
Ap-2014	Zone A		308830	4501718	805.31	24.30	9.48	39.68	8.20
Ap-2014	Zone B		308843	4501320	381.28	26.01	16.12	37.66	8.59
Ap-2014	Zone B		308810	4501345	435.89	25.19	14.97	37.64	8.51
Ap-2014	Zone B		308789	4501369	464.79	25.23	14.39	37.54	8.46
Ap-2014	Zone B		308764	4501386	498.6	26.35	16.82	36.81	8.67
Ap-2014	Zone B		308742	4501401	495.76	25.38	15.73	36.09	8.48
Ap-2014	Zone B		308702	4501428	534.06	28.12	19.15	36.05	8.74
Ap-2014	Zone B		308665	4501430	489.35	26.36	8.23	35.69	8.04
Ap-2014	Zone B		308644	4501410	410.6	25.84	7.69	35.50	7.99
Ap-2014	Zone B		308591	4501367	347.57	26.00	6.73	35.43	7.95
Ap-2014	Zone B		308579	4501316	363.77	25.20	6.64	34.82	7.87
Ap-2014	Zone B		308612	4501287	368.44	24.75	6.86	35.04	7.89
Ap-2014	Zone B		308634	4501310	394.73	25.27	7.35	34.90	7.94
Ap-2014	Zone B		308675	4501303	419.6	25.14	10.72	35.48	8.18
Ap-2014	Zone B		308671	4501273	413.35	26.16	15.10	35.57	8.49
Ap-2014	Zone B		308706	4501258	337.15	26.57	16.40	36.44	8.68
Ap-2014	Zone B		308706	4501293	454.98	25.39	14.43	36.52	8.50
Ap-2014	Zone B		308722	4501291	411.16	27.80	12.69	36.42	8.55
Ap-2014	Zone B		308750	4501284	353.54	26.40	16.18	36.94	8.69
Ap-2014	Zone B		308762	4501249	331.9	25.03	11.59	38.18	8.32
Ap-2014	Zone B		308781	4501239	289.95	24.67	13.72	37.55	8.47
Ap-2014	Zone B		308794	4501261	373.2	25.79	12.69	37.17	8.58
Ap-2014	Zone B		308809	4501256	371.56	27.34	14.69	37.78	8.81
Ap-2014	Zone B		308807	4501223	323.41	25.39	11.99	38.07	8.42
Ap-2014	Zone B		308816	4501203	268.05	24.57	11.97	38.45	8.39
Ap-2014	Zone B		308726	4501139	217.3	24.62	10.19	36.79	8.29
Ap-2014	Zone B		308705	4501167	248.04	24.61	12.60	36.78	8.43
Ap-2014	Zone B		308676	4501189	295.9	26.19	13.13	35.85	8.51
Ap-2014	Zone B		308651	4501202	327.33	25.39	10.19	34.74	8.11
Ap-2014	Zone B		308617	4501218	318.16	25.04	7.85	34.60	7.96
Ap-2014	Zone B		308585	4501238	360.23	25.22	6.88	34.58	7.86
Ap-2014	Zone B		308559	4501256	303.58	24.31	7.17	34.40	7.80
Ap-2014	Zone B		308532	4501275	265.8	24.42	8.07	33.66	7.87
Ap-2014	Zone B		308545	4501299	301.63	24.28	7.77	33.73	7.84
Ap-2014	Zone B		308567	4501339	341.55	25.02	6.67	35.30	7.84
